# Supplementary material for: Relationship between the urea–creatinine ratio and mortality in septic patients with and without chronic kidney disease: A retrospective single-center Chinese intensive care unit cohort study
Source: Research Square preprint supplement (doi:10.21203/rs.3.rs-6783609/v1), 2025-07-10
Supplement: Supplementary file 1 [file a6abbcac8e41204f51f12417.docx]

**Table S1** **Univariate logistic regression analysis**

| **Variables** |  |  |  | ***P*** | **OR (95%CI)** |
| --- | --- | --- | --- | --- | --- |
| Age at admission(years) |  |  |  | 0.480 | 0.995 (0.980 ~ 1.009) |
| Gender |  |  |  |  |  |
| Male |  |  |  |  | 1.000 (Reference) |
| Female |  |  |  | 0.826 | 1.045 (0.704 ~ 1.551) |
| Temperature (℃) |  |  |  | 0.212 | 1.125 (0.935 ~ 1.355) |
| Heart rate (bpm) |  |  |  | **<0.001** | 1.012 (1.005 ~ 1.019) |
| Respiratory rate (bpm) |  |  |  | 0.225 | 1.014 (0.992 ~ 1.036) |
| SBP (mmHg) |  |  |  | 0.434 | 0.997 (0.989 ~ 1.005) |
| DBP (mmHg) |  |  |  | 0.239 | 0.993 (0.981 ~ 1.005) |
| SpO2 (%) |  |  |  | 0.188 | 1.020 (0.990 ~ 1.052) |
| CKD |  |  |  |  |  |
| No |  |  |  |  | 1.000 (Reference) |
| Yes |  |  |  | **<0.001** | 2.107 (1.395 ~ 3.182) |
| CHF |  |  |  |  |  |
| No |  |  |  |  | 1.000 (Reference) |
| Yes |  |  |  | **0.002** | 1.852 (1.251 ~ 2.743) |
| COPD |  |  |  |  |  |
| No |  |  |  |  | 1.000 (Reference) |
| Yes |  |  |  | 0.090 | 0.693 (0.453 ~ 1.059) |
| BUN (mmol/L) |  |  |  | **<0.001** | 1.033 (1.014 ~ 1.052) |
| Creatinine (umol/L) |  |  |  | 0.390 | 1.000 (1.000 ~ 1.001) |
| UCR |  |  |  | **<0.001** | 1.048 (1.029 ~ 1.067) |
| Cys C (mg/L) |  |  |  | 0.122 | 1.094 (0.976 ~ 1.226) |
| UA (umol/L) |  |  |  | **0.020** | 1.001 (1.001 ~ 1.002) |
| WBC (10^9/L) |  |  |  | 0.576 | 1.005 (0.987 ~ 1.024) |
| Lymphocyte Count (10^9/L) |  |  |  | 0.632 | 0.978 (0.892 ~ 1.072) |
| Neutrophil Count (10^9/L) |  |  |  | 0.701 | 0.995 (0.971 ~ 1.020) |
| Monocyte Count (10^9/L) |  |  |  | 0.867 | 0.965 (0.637 ~ 1.463) |
| HB (g/L) |  |  |  | 0.826 | 0.999 (0.992 ~ 1.006) |
| HCT |  |  |  | 0.886 | 0.839 (0.076 ~ 9.298) |
| PLT (10^9/L) |  |  |  | 0.750 | 1.000 (0.999 ~ 1.001) |
| D-Dimer (mg/L) |  |  |  | 0.502 | 1.004 (0.993 ~ 1.015) |
| PT (sec) |  |  |  | 0.101 | 1.023 (0.996 ~ 1.050) |
| INR |  |  |  | 0.094 | 1.246 (0.963 ~ 1.613) |
| APTT (sec) |  |  |  | **0.047** | 1.014 (1.001 ~ 1.027) |
| FIB (g/L) |  |  |  | 0.907 | 0.994 (0.898 ~ 1.101) |
| Potassium (mmol/L) |  |  |  | 0.124 | 1.173 (0.957 ~ 1.437) |
| Sodium (mmol/L) |  |  |  | 0.217 | 1.014 (0.992 ~ 1.038) |
| Chloride (mmol/L) |  |  |  | 0.592 | 1.006 (0.985 ~ 1.027) |
| Calcium (mmol/L) |  |  |  | 0.072 | 2.159 (0.934 ~ 4.989) |
| CRP (mg/L) |  |  |  | 0.097 | 1.002 (1.000 ~ 1.005) |
| ALT (U/L) |  |  |  | 0.851 | 1.000 (0.999 ~ 1.001) |
| AST (U/L) |  |  |  | 0.798 | 1.000 (1.000 ~ 1.000) |
| DBIL (umol/L) |  |  |  | **0.016** | 1.015 (1.003 ~ 1.027) |
| IBIL (umol/L) |  |  |  | **0.045** | 1.019 (1.001 ~ 1.039) |
| Albumin (g/L) |  |  |  | 0.690 | 1.007 (0.975 ~ 1.039) |
| Globulin (g/L) |  |  |  | 0.724 | 0.995 (0.968 ~ 1.023) |
| SOFA score |  |  |  | **<0.001** | 1.227 (1.152 ~ 1.306) |
| CRRT |  |  |  |  |  |
| No |  |  |  |  | 1.000 (Reference) |
| Yes |  |  |  | **0.024** | 2.084 (1.100 ~ 3.947) |
| Ventilator |  |  |  |  |  |
| No |  |  |  |  | 1.000 (Reference) |
| Yes |  |  |  | **<0.001** | 5.245 (2.193 ~ 12.545) |

***Abbreviations:*** CKD, chronic kidney disease; SBP, systolic blood pressure; DBP, diastolic blood pressure; SpO2, pulse oxygen saturation; CHF, congestive heart failure; COPD, chronic obstructive pulmonary disease; BUN, blood urea nitrogen; UCR, urea-creatinine ratio; Cys C, Cystatin C; UA, uric acid; WBC, white blood cell count; HB, hemoglobin; HCT, hematocrit; SD, standard deviation; PLT, platelet; PT, prothrombin time; INR, international normalized ratio; APTT, activated partial thromboplastin time; FIB, fibrinogen; CRP, C-reactive protein; ALT, alanine aminotransferase; AST, aspartate aminotransferase; DBIL, direct bilirubin; IBIL, indirect bilirubin; SOFA, sequential organ failure assessment; CRRT, continuous renal replacement therapy.

**Table S2** **Multivariate logistic regression analysis and the variance inflation factor test**

| **Variables** 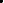 | ***P*** | **OR (95% CI)** | **VIF** |
| --- | --- | --- | --- |
| Heart rate (bpm) | **0.002** | 1.012 (1.004 ~ 1.020) | 1.051 |
| CKD |  |  | 1.126 |
| No |  | 1.000 (Reference) |  |
| Yes | **0.001** | 2.260 (1.384 ~ 3.690) |  |
| CHF |  |  | 1.107 |
| No |  | 1.000 (Reference) |  |
| Yes | 0.095 | 1.484 (0.933 ~ 2.360) |  |
| COPD |  |  | 1.064 |
| No |  | 1.000 (Reference) |  |
| Yes | 0.268 | 0.761 (0.469 ~ 1.234) |  |
| UCR | **<0.001** | 1.063 (1.040 ~ 1.086) | 1.089 |
| UA (umol/L) | 0.057 | 1.001 (1.000 ~ 1.002) | 1.175 |
| INR | 0.840 | 1.034 (0.748 ~ 1.429) | 1.424 |
| APTT (sec) | 0.130 | 1.013 (0.996 ~ 1.031) | 1.400 |
| Potassium (mmol/L) | 0.136 | 2.120 (0.789 ~ 5.693) | 1.089 |
| CRP (mg/L) | 0.781 | 1.000 (0.997 ~ 1.003) | 1.078 |
| DBIL (umol/L) | 0.613 | 1.006 (0.982 ~ 1.031) | 3.985 |
| IBIL (umol/L) | 0.595 | 1.011 (0.972 ~ 1.051) | 3.886 |
| CRRT |  |  | 1.223 |
| No |  | 1.000 (Reference) |  |
| Yes | 0.120 | 1.872 (0.849 ~ 4.127) |  |
| Ventilator |  |  | 1.044 |
| No |  | 1.000 (Reference) |  |
| Yes | **<0.001** | 6.414 (2.363 ~ 17.409) |  |

**Notes:** (1) Univariate logistic regression identified variables with *P* < 0.1 for inclusion in later multivariate models.; (2) Since the UCR and SOFA scores already contained other univariate variables used in the multivariate models, they were excluded from further analysis; (3) There are no variables with a variance inflation factor greater than 5. (4) The final model retained the following variables: CKD (yes or no), heart rate, and ventilator use (yes or no).

***Abbreviations:***OR, odds ratio; CI, confidence interval; VIF, variance inflation factor; CKD, chronic kidney disease; CHF, congestive heart failure; COPD, chronic obstructive pulmonary disease; UCR, urea-creatinine ratio; UA, uric acid; INR, international normalized ratio; APTT, activated partial thromboplastin time; CRP, C-reactive protein; DBIL, direct bilirubin; IBIL, indirect bilirubin; CRRT, continuous renal replacement therapy.

**Table S3 The performance of UCR for in-hospital mortality**

| **Model** | **Optimal cut-off value** | **Youden's index** | **Sensitivity** | **Specificity** | ***P*** |
| --- | --- | --- | --- | --- | --- |
| UCR predicting in-hospital mortality among septic patients | 30.388 | 0.22 | 0.82 | 0.40 | **<0.001** |
| UCR predicting in-hospital mortality among septic patients without CKD | 29.117 | 0.31 | 0.80 | 0.51 | **<0.001** |
| UCR predicting in-hospital mortality among septic patients with CKD | 14.552 | 0.15 | 0.29 | 0.86 | 0.265 |

***Abbreviations*:** UCR, urea-creatinine ratio; CKD, chronic kidney disease.
